# Supplementary material for: Prophylactic biological mesh reinforcement versus standard closure of stoma site (ROCSS): a multicentre, randomised controlled trial
Source: PubMed Central journal article supplement — Lancet. 2020 Feb 8;395(10222):417–26. doi: 10.1016/S0140-6736(19)32637-6 (PMC7016509; doi:10.1016/s0140-6736(19)32637-6), 2020-02-08
Supplement: mmc1.pdf [file mmc1.pdf]

# THE LANCET

## Supplementary appendix

This appendix formed part of the original submission and has been peer reviewed. We post it as supplied by the authors.

Supplement to: Reinforcement of Closure of Stoma Site (ROCSS) Collaborative and West Midlands Research Collaborative. Prophylactic biological mesh reinforcement versus standard closure of stoma site (ROCSS): a multicentre, randomised controlled trial. *Lancet* 2020; **395**: 417–26.

## Appendix

### **Multicentre randomised controlled trial of prophylactic biologic mesh reinforcement versus standard closure of stoma site**

*Reinforcement of Closure of Stoma Site (ROCSS) Collaborative and West Midlands Research Collaborative*

**Corresponding author:** [a.a.bhangu@bham.ac.uk](mailto:a.a.bhangu@bham.ac.uk)

Mr Aneel Bhangu MBChB PhD FRCS, NIHR Clinician Scientist in Global Surgery, Honorary Consultant Colorectal Surgeon, Office 15, Second Floor, Institute of Translational Medicine, University of Birmingham, Heritage Building, Birmingham, B15 2TT

### Supplemental Figure 1: Reasons eligible patients were not randomised

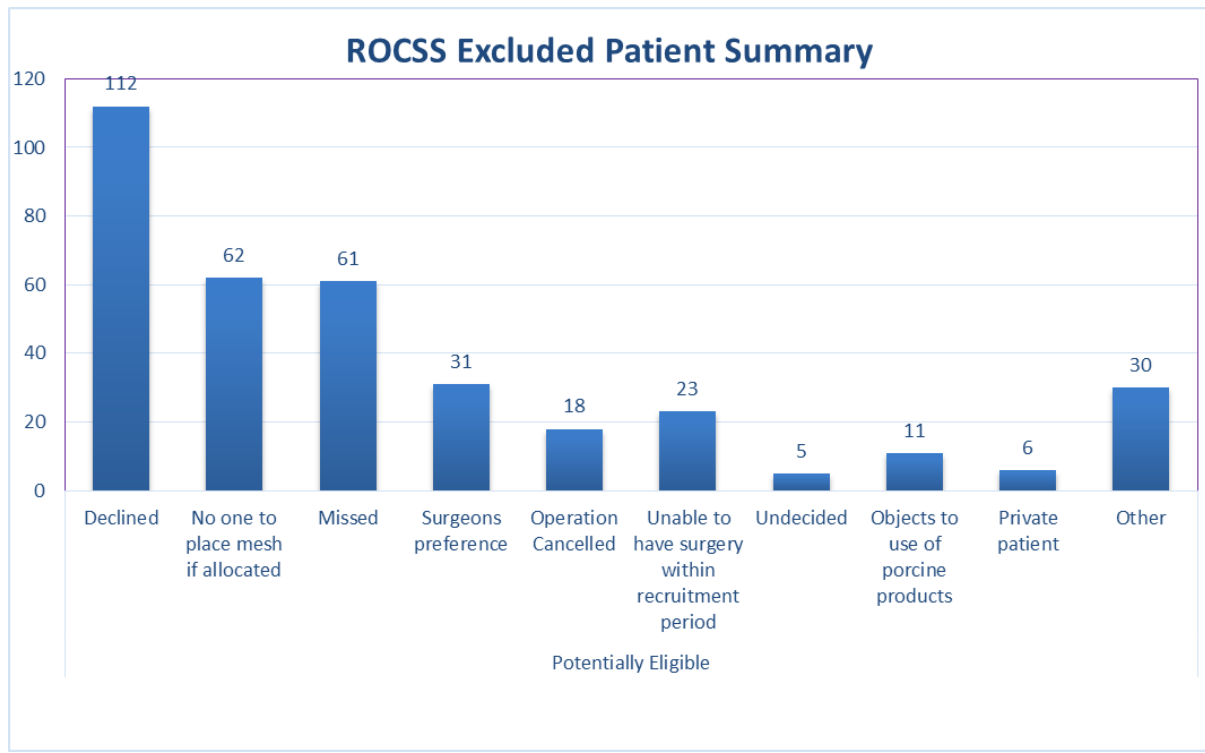

The acceptance rate was 68.8% (790/1149).

An additional 137 patients were screened but were identified as being ineligible for this trial.

## Supplemental Figure 2: Reasons for protocol violation

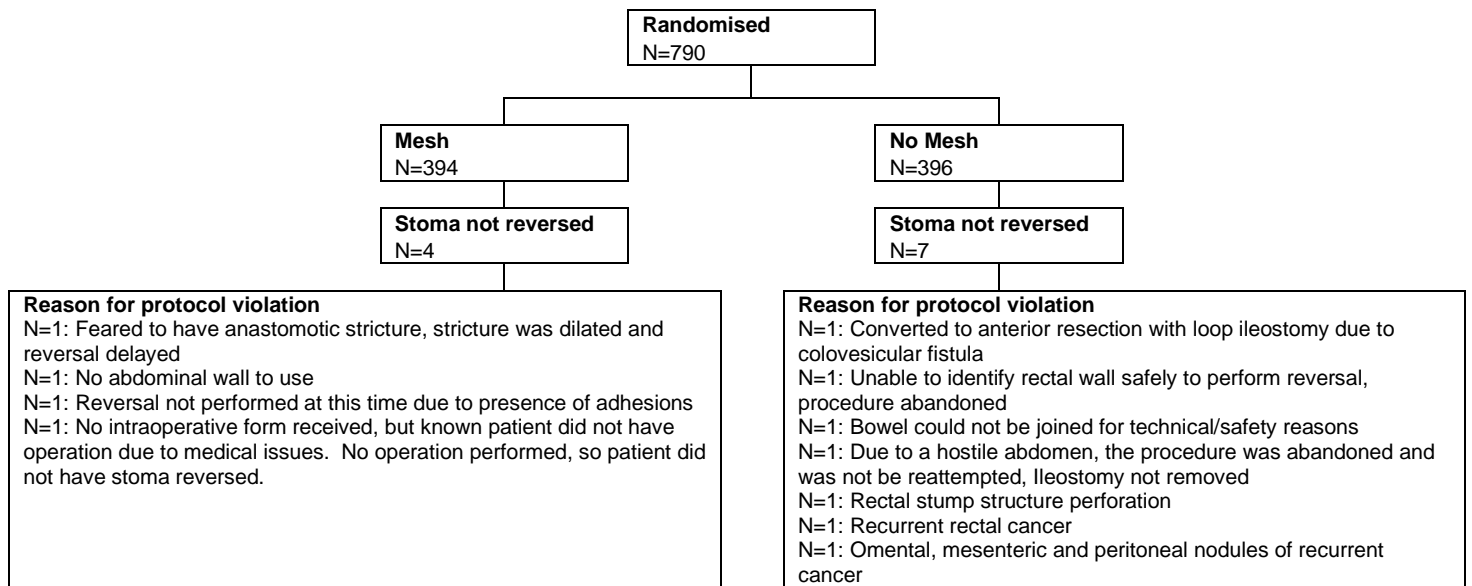

### Supplemental Figure 3: Reasons for non-compliance

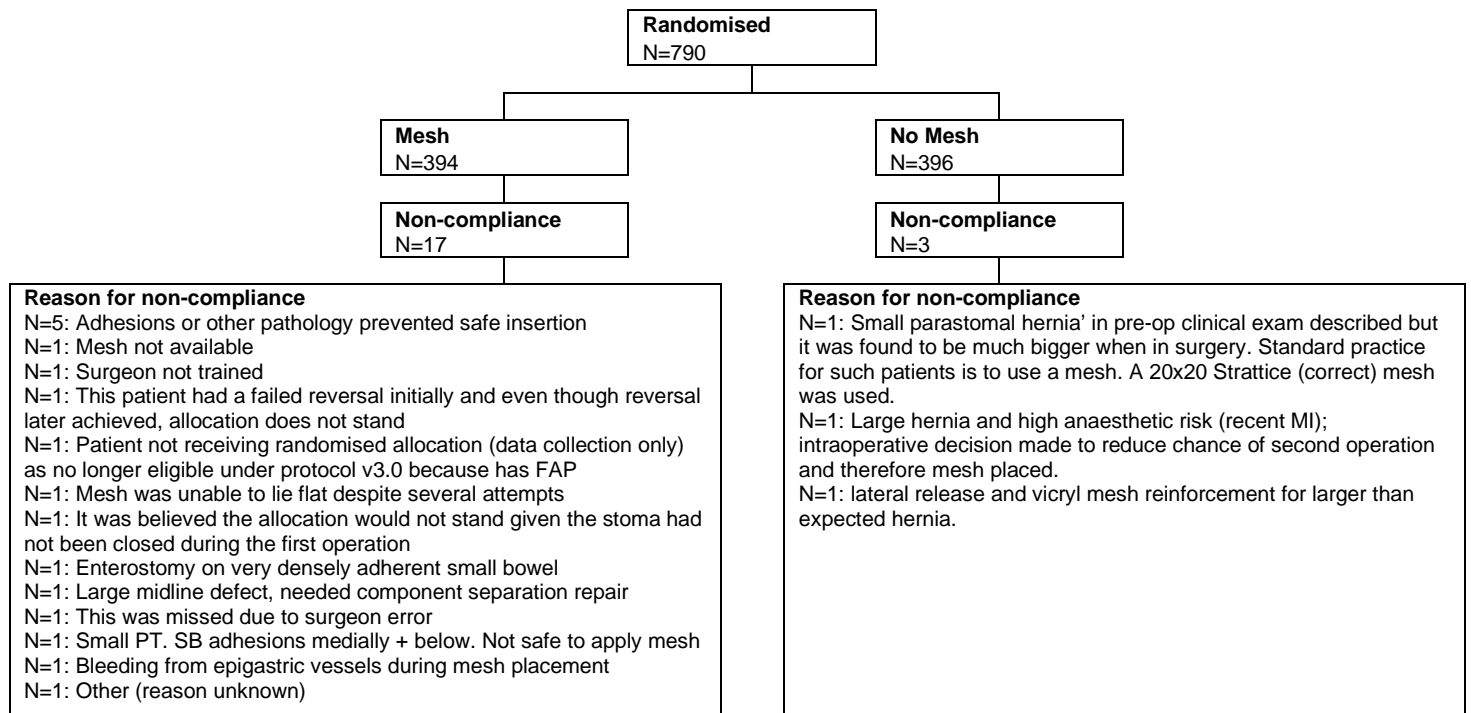

### Supplemental Figure 4: Subgroup analysis forest plot

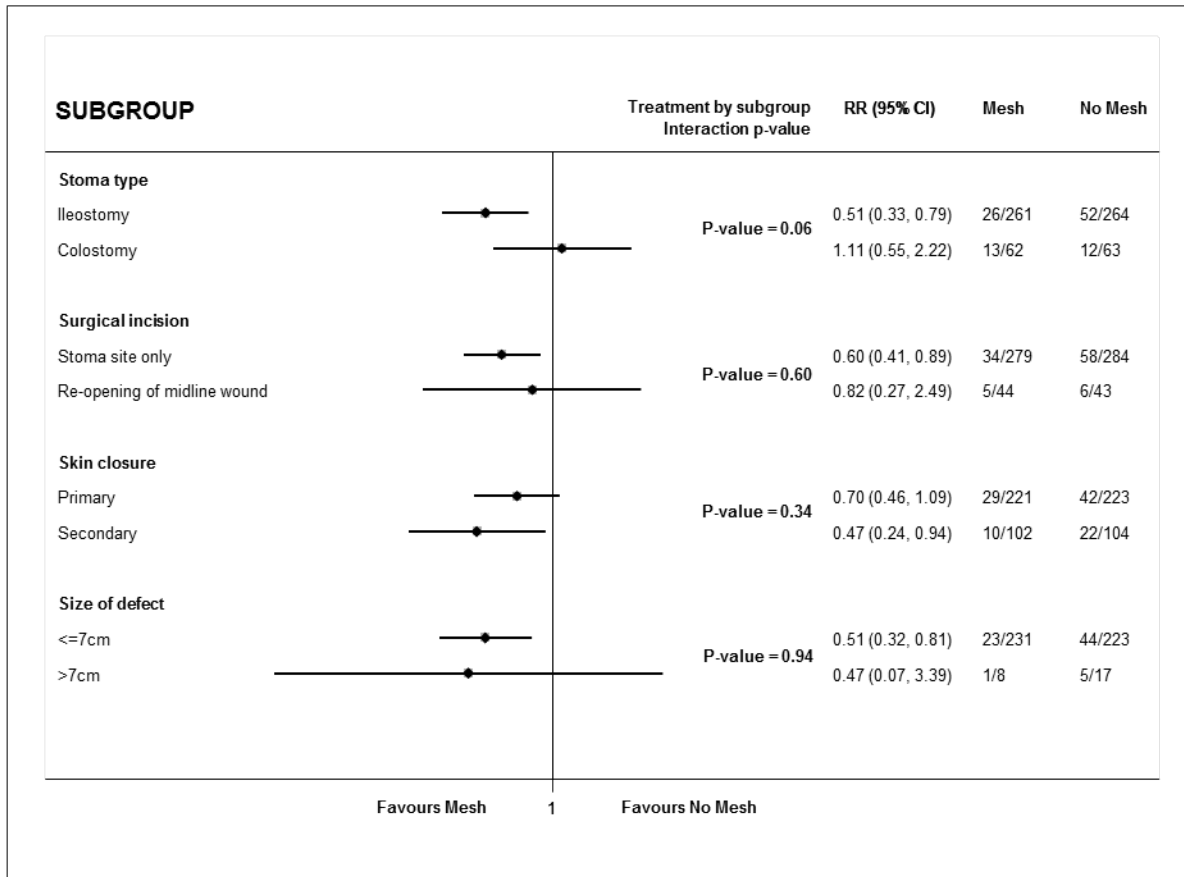

*In addition, to planned subgroup analyses for the three minimisation variables (midline laparotomy planned; planned skin closure; type of stoma being closed), a pre-specified subgroup analysis was planned for the size of fascial defect.*

**Supplemental Table 1: Restrictions on 2 year follow-up for primary outcome data**

| <b>Reason for loss to 2 year follow up for primary outcome data</b> | <b>Mesh (N=394)</b> | <b>No Mesh (N=396)</b> | <b>Total (N=790)</b> |
|---------------------------------------------------------------------|---------------------|------------------------|----------------------|
| Stoma not reversed                                                  | 4                   | 7                      | 11                   |
| Missing data in 24 month form                                       | 16                  | 16                     | 32                   |
| Outside +/- 3 months' time window                                   | 4                   | 8                      | 12                   |
| No 24 month follow-up form                                          | 47                  | 38                     | 85                   |

**Supplemental Table 2: Sensitivity analyses for primary outcome**

| Clinical hernia at 2 years                                                                     | Mesh          | No mesh       | Relative Risk<br>(95% Confidence<br>Interval) | P-value |
|------------------------------------------------------------------------------------------------|---------------|---------------|-----------------------------------------------|---------|
| Primary Outcome Analysis*                                                                      | 39/323 (12.1) | 64/327 (19.6) | 0.62 (0.43-0.90)                              | 0.012   |
| <b>Sensitivity Analyses</b>                                                                    |               |               |                                               |         |
| Unadjusted intention to treat analysis                                                         | 39/323 (12.1) | 64/327 (19.6) | 0.62 (0.43-0.89)                              | 0.010   |
| Adjusted <sup>†</sup> intention to treat analysis                                              | 39/323 (12.1) | 64/327 (19.6) | 0.63 (0.44-0.91)                              | 0.013   |
| Adjusted* intention to treat analysis (no time restrictions)                                   | 42/327 (12.8) | 69/335 (20.6) | 0.63 (0.44-0.90)                              | 0.010   |
| Adjusted* intention to treat analysis with stoma not reversed patients classified as no hernia | 39/327 (11.9) | 64/334 (19.2) | 0.63 (0.44, 0.91)                             | 0.013   |
| Adjusted* per-protocol analysis                                                                | 36/310 (11.6) | 63/325 (19.4) | 0.60 (0.41-0.88)                              | 0.009   |
| Adjusted* per-protocol analysis (no time restrictions)                                         | 39/314 (12.4) | 68/333 (20.4) | 0.61 (0.43-0.88)                              | 0.008   |

\*Adjusted for minimisation variables (midline laparotomy planned; planned skin closure; type of stoma being closed)

†Adjusted for minimisation variables (midline laparotomy planned; planned skin closure; type of stoma being closed), and age, gender, diabetes

Relative risk <1 favours Mesh

Analyses based on patients with outcome assessed within 3 months before or after the 2 year time point, unless recorded as having no time restrictions, in which case all patients with outcome data were included.



**Supplementary Table 3: Characteristics of patients included in the analysis for the radiological hernia outcome at 1 year**

| Baseline characteristics                |            | Baseline data for all patients randomised to ROCSS |                 |               | Baseline data for patients included in the analysis for the radiological hernia outcome at 1 year |                 |               |
|-----------------------------------------|------------|----------------------------------------------------|-----------------|---------------|---------------------------------------------------------------------------------------------------|-----------------|---------------|
|                                         |            | Mesh (N=394)                                       | No Mesh (N=396) | Total (N=790) | Mesh (N=229)                                                                                      | No Mesh (N=226) | Total (N=455) |
| Age                                     | Mean (SD)  | 58.4 (16.0)                                        | 59.0 (16.0)     | 58.7 (16.0)   | 59.3 [15.5]                                                                                       | 60.0 [15.0]     | 59.6 [15.3]   |
|                                         | Min-Max    | 18.0 - 89.0                                        | 19.0 - 89.0     | 18.0 - 89.0   | 18 - 89                                                                                           | 19 - 87         | 18 - 89       |
| Sex                                     | Male       | 263 (67%)                                          | 251 (63%)       | 514 (65%)     | 150 (65.5%)                                                                                       | 132 (58.4%)     | 282 (62%)     |
|                                         | Female     | 131 (33%)                                          | 145 (37%)       | 276 (35%)     | 79 (34.5%)                                                                                        | 94 (41.6%)      | 173 (38%)     |
| Body mass index                         | Mean (SD)  | 26.8 (4.8)                                         | 26.6 (5.2)      | 26.7 (5.0)    | 26.7 [4.9]                                                                                        | 26.4 [5.0]      | 26.6 [4.9]    |
| Diabetes                                | No         | 351 (89%)                                          | 357 (90%)       | 708 (90%)     | 205 (89.5%)                                                                                       | 203 (89.8%)     | 408 (89.7%)   |
|                                         | Yes        | 42 (11%)                                           | 37 (9%)         | 79 (10%)      | 24 (10.5%)                                                                                        | 22 (9.7%)       | 46 (10.1%)    |
|                                         | Missing    | 1 (<1%)                                            | 2 (<1%)         | 3 (<1%)       | 0 (0%)                                                                                            | 1 (0.4%)        | 1 (0.2%)      |
| Steroid medications                     | No         | 377 (96%)                                          | 382 (97%)       | 759 (96%)     | 219 (95.6%)                                                                                       | 218 (96.5%)     | 437 (96%)     |
|                                         | Yes        | 15 (4%)                                            | 12 (3.0%)       | 27 (3%)       | 10 (4.4%)                                                                                         | 7 (3.1%)        | 17 (3.7%)     |
|                                         | Missing    | 2 (<1%)                                            | 2 (<1%)         | 4 (<1%)       | 0 (0%)                                                                                            | 1 (0.4%)        | 1 (0.2%)      |
| Original indication for stoma           | Cancer     | 227 (58%)                                          | 217 (55%)       | 444 (56%)     | 131 (57.2%)                                                                                       | 120 (53.1%)     | 251 (55.2%)   |
|                                         | Non-cancer | 167 (42%)                                          | 179 (45%)       | 346 (44%)     | 98 (42.8%)                                                                                        | 106 (46.9%)     | 204 (44.8%)   |
| Type of stoma opening                   | Loop       | 295 (75%)                                          | 310 (78%)       | 605 (77%)     | 172 (75.1%)                                                                                       | 177 (78.3%)     | 349 (76.7%)   |
|                                         | End        | 99 (25%)                                           | 86 (22%)        | 185 (23%)     | 57 (24.9%)                                                                                        | 49 (21.7%)      | 106 (23.3%)   |
| Type of stoma being closed <sup>†</sup> | Ileostomy  | 315 (80%)                                          | 316 (80%)       | 631 (80%)     | 182 (79.5%)                                                                                       | 181 (80.1%)     | 363 (79.8%)   |
|                                         | Colostomy  | 79 (20%)                                           | 80 (20%)        | 159 (20%)     | 47 (20.5%)                                                                                        | 45 (19.9%)      | 92 (20.2%)    |
| Side of stoma                           | Right side | 307 (78%)                                          | 306 (77%)       | 613 (78%)     | 179 (78.2%)                                                                                       | 175 (77.4%)     | 354 (77.8%)   |
|                                         | Left side  | 87 (22%)                                           | 90 (23%)        | 177 (22%)     | 50 (21.8%)                                                                                        | 51 (22.6%)      | 101 (22.2%)   |
| Parastomal hernia evident               | No         | 284 (72%)                                          | 301 (76%)       | 585 (74%)     | 161 (70.3%)                                                                                       | 174 (77%)       | 335 (73.6%)   |
|                                         | Yes        | 110 (28%)                                          | 95 (24%)        | 205 (26%)     | 68 (29.7%)                                                                                        | 52 (23%)        | 120 (26.4%)   |
| Midline incisional hernia evident       | No         | 372 (94%)                                          | 380 (96%)       | 752 (95%)     | 215 (93.9%)                                                                                       | 218 (96.5%)     | 433 (95.2%)   |
|                                         | Yes        | 22 (6%)                                            | 16 (4%)         | 38 (5%)       | 14 (6.1%)                                                                                         | 8 (3.5%)        | 22 (4.8%)     |
| Midline laparotomy planned <sup>†</sup> | No         | 339 (86%)                                          | 341 (86%)       | 680 (86%)     | 202 (88.2%)                                                                                       | 199 (88.1%)     | 401 (88.1%)   |
|                                         | Yes        | 55 (14%)                                           | 55 (14%)        | 110 (14%)     | 27 (11.8%)                                                                                        | 27 (11.9%)      | 54 (11.9%)    |
| Planned skin closure <sup>†</sup>       | Primary    | 274 (70%)                                          | 274 (69%)       | 548 (70%)     | 153 (66.8%)                                                                                       | 154 (68.1%)     | 307 (67.5%)   |
|                                         | Secondary  | 120 (30%)                                          | 120 (30%)       | 240 (30%)     | 76 (33.2%)                                                                                        | 71 (31.4%)      | 147 (32.3%)   |
|                                         | Missing    | 0 (0.0%)                                           | 2 (1%)          | 2 (<1%)       | 0 (0%)                                                                                            | 1 (0.4%)        | 1 (0.2%)      |

**Supplementary Table 4: Pain scores**

| Pain               | Time point       | Mesh               | No Mesh            | Total              | Linear regression model                                                    | Repeat measures model                                          |
|--------------------|------------------|--------------------|--------------------|--------------------|----------------------------------------------------------------------------|----------------------------------------------------------------|
|                    |                  |                    |                    |                    | Adjusted mean difference <sup>§</sup> (95% Confidence Interval)<br>P-value | Effect Size <sup>§</sup> (95% CI)<br>P-value                   |
| <b>Pain score*</b> |                  |                    |                    |                    |                                                                            |                                                                |
| N                  | Baseline         | 347                | 346                | 693                | -                                                                          | 0.438 (-1.965, 2.841)<br>0.72                                  |
| Mean [SD]          |                  | 15.1 [25.7]        | 15.5 [25.5]        | 15.3 [25.6]        |                                                                            |                                                                |
| Min – Max          |                  | 0 – 100            | 0 – 100            | 0 – 100            |                                                                            |                                                                |
| N                  | 30 day           | 336                | 334                | 670                | -0.808 (-4.214, 2.598)<br>0.64                                             |                                                                |
| Mean [SD]          |                  | 17.5 [22.1]        | 18.2 [22.3]        | 17.8 [22.2]        |                                                                            |                                                                |
| Min – Max          |                  | 0 – 100            | 0 – 100            | 0 – 100            |                                                                            |                                                                |
| N                  | 12 months        | 338                | 335                | 673                | 2.283 (-1.594, 6.159)<br>0.25                                              | <b>Treatment by Time Interaction</b><br><b>P-value</b><br>0.67 |
| Mean [SD]          |                  | 15.5 [26.6]        | 14.1 [24.0]        | 14.8 [25.3]        |                                                                            |                                                                |
| Min – Max          |                  | 0 – 100            | 0 – 100            | 0 – 100            |                                                                            |                                                                |
| <b>N</b>           | <b>24 months</b> | <b>316</b>         | <b>309</b>         | <b>625</b>         | <b>0.123 (-3.895, 4.140)</b><br><b>0.95</b>                                |                                                                |
| <b>Mean [SD]</b>   |                  | <b>12.9 [24.6]</b> | <b>12.5 [23.4]</b> | <b>12.7 [24.0]</b> |                                                                            |                                                                |
| <b>Min – Max</b>   |                  | <b>0 – 100</b>     | <b>0 – 100</b>     | <b>0 – 100</b>     |                                                                            |                                                                |

\*Pain score ranges from 0-100, with higher scores indicating worse outcome

§adjusted for all minimisation variables (stoma type, surgical incision, skin closure type) and baseline score. Estimates from the repeated measures analyses are based on model without the treatment by time interaction term.

Differences <0 favour Mesh.

The pain score at the 2 year time-point (shown in bold) is the primary analysis.

**Supplementary Table 5: Quality of life (EQ-5D EuroQol score and VAS score)**

| EQ-5D                                  | Time point       | Mesh                | No Mesh             | Total               | Linear regression model                                                    | Repeat measures model                                                                            |
|----------------------------------------|------------------|---------------------|---------------------|---------------------|----------------------------------------------------------------------------|--------------------------------------------------------------------------------------------------|
|                                        |                  |                     |                     |                     | Adjusted mean difference <sup>§</sup> (95% Confidence Interval)<br>P-value | Effect Size <sup>§</sup> (95% Confidence Interval)<br>P-value                                    |
| <b>EQ-5D EuroQol score<sup>†</sup></b> |                  |                     |                     |                     |                                                                            |                                                                                                  |
| N                                      | Baseline         | 384                 | 385                 | 769                 | -                                                                          | -0.004 (-0.026, 0.018)<br>0.74<br><b>Treatment by Time Interaction</b><br><b>P-value</b><br>0.31 |
| Mean [SD]                              |                  | 0.87 [0.20]         | 0.87 [0.18]         | 0.87 [0.19]         |                                                                            |                                                                                                  |
| Min – Max                              |                  | -0.59 – 1.00        | -0.14 – 1.00        | -0.59 – 1.00        |                                                                            |                                                                                                  |
| N                                      | 30 day           | 361                 | 360                 | 721                 | -0.018 (-0.050, 0.014)<br>0.27                                             |                                                                                                  |
| Mean [SD]                              |                  | 0.79 [0.23]         | 0.81 [0.23]         | 0.80 [0.23]         |                                                                            |                                                                                                  |
| Min – Max                              |                  | -0.48 – 1.00        | -0.59 – 1.00        | -0.59 – 1.00        |                                                                            |                                                                                                  |
| N                                      | 12 months        | 338                 | 337                 | 675                 | 0.006 (-0.022, 0.035)<br>0.66                                              |                                                                                                  |
| Mean [SD]                              |                  | 0.86 [0.19]         | 0.84 [0.21]         | 0.85 [0.20]         |                                                                            |                                                                                                  |
| Min – Max                              |                  | -0.18 – 1.00        | -0.18 – 1.00        | -0.18 – 1.00        |                                                                            |                                                                                                  |
| <b>N</b>                               | <b>24 months</b> | <b>314</b>          | <b>314</b>          | <b>628</b>          | <b>0.006 (-0.027, 0.039)</b><br><b>0.72</b>                                |                                                                                                  |
| <b>Mean [SD]</b>                       |                  | <b>0.85 [0.22]</b>  | <b>0.85 [0.23]</b>  | <b>0.85 [0.23]</b>  |                                                                            |                                                                                                  |
| <b>Min – Max</b>                       |                  | <b>-0.08 – 1.00</b> | <b>-0.08 – 1.00</b> | <b>-0.08 – 1.00</b> |                                                                            |                                                                                                  |
| <b>EQ-5D VAS score<sup>†</sup></b>     |                  |                     |                     |                     |                                                                            |                                                                                                  |
| N                                      | Baseline         | 385                 | 386                 | 771                 | -                                                                          | -0.866 (-2.770, 1.037)<br>0.37<br><b>Treatment by Time Interaction</b><br><b>P-value</b><br>0.94 |
| Mean [SD]                              |                  | 80.2 [16.6]         | 79.7 [17.2]         | 79.9 [16.9]         |                                                                            |                                                                                                  |
| Min – Max                              |                  | 6 – 100             | 0 – 100             | 0 – 100             |                                                                            |                                                                                                  |
| N                                      | 30 day           | 362                 | 364                 | 726                 | -0.396 (-2.882, 2.090)<br>0.75                                             |                                                                                                  |
| Mean [SD]                              |                  | 76.2 [18.1]         | 76.3 [18.3]         | 76.2 [18.2]         |                                                                            |                                                                                                  |
| Min – Max                              |                  | 10 – 100            | 0 – 100             | 0 – 100             |                                                                            |                                                                                                  |
| N                                      | 12 months        | 345                 | 339                 | 684                 | -1.606 (-4.207, 0.996)<br>0.23                                             |                                                                                                  |
| Mean [SD]                              |                  | 78.2 [19.8]         | 79.4 [17.8]         | 78.8 [18.8]         |                                                                            |                                                                                                  |
| Min – Max                              |                  | 0 – 100             | 0 – 100             | 0 – 100             |                                                                            |                                                                                                  |
| <b>N</b>                               | <b>24 months</b> | <b>321</b>          | <b>314</b>          | <b>635</b>          | <b>-0.179 (-2.883, 2.525)</b><br><b>0.90</b>                               |                                                                                                  |
| <b>Mean [SD]</b>                       |                  | <b>80.0 [19.0]</b>  | <b>80.0 [17.6]</b>  | <b>80.0 [18.3]</b>  |                                                                            |                                                                                                  |
| <b>Min – Max</b>                       |                  | <b>0 – 100</b>      | <b>1 – 100</b>      | <b>0 – 100</b>      |                                                                            |                                                                                                  |

\*EQ-5D EuroQol Score ranges from -0.59 – 1, with higher scores indicating better outcome

†EQ-5D VAS ranges from 0 – 100, with higher scores indicating better outcome

§adjusted for all minimisation variables (stoma type, surgical incision, skin closure type) and baseline score. Estimates from the repeated measures analyses are based on model without the treatment by time interaction term.

Differences >0 favour Mesh.

The EQ-5D scores at the 2 year time-point (shown in bold) are the primary analyses.

**Supplementary Table 6: Serious Adverse Events**

| SAE Category                                                 | Mesh (N=394) |        | No Mesh (N=396) |        | Total (N=790) |        |
|--------------------------------------------------------------|--------------|--------|-----------------|--------|---------------|--------|
|                                                              | Patients     | Events | Patients        | Events | Patients      | Events |
| <b>WOUND</b>                                                 |              |        |                 |        |               |        |
| Stoma Site wound infection/Midline Non Stoma wound infection | 39 (10%)     | 41     | 43 (11%)        | 44     | 82 (10%)      | 85     |
| Uncertain/Surgical Site Infection                            | 12 (3%)      | 12     | 6 (2%)          | 6      | 18 (2%)       | 18     |
| Seroma formation                                             | 2 (1%)       | 2      | 1 (<1%)         | 1      | 3 (<1%)       | 3      |
| Excess Wound Pain                                            | 4 (1%)       | 5      | 2 (1%)          | 2      | 6 (1%)        | 7      |
| Wound Haematoma                                              | 3 (1%)       | 3      | 7 (2%)          | 7      | 10 (1%)       | 10     |
| <b>CARDIAC</b>                                               |              |        |                 |        |               |        |
| Arrhythmia/Bradycardia                                       | 5 (1%)       | 6      | 3 (1%)          | 3      | 8 (1%)        | 9      |
| Congestive Cardiac Failure                                   | 2 (1%)       | 2      | 0 (0%)          | 0      | 2 (<1%)       | 2      |
| Hypotension                                                  | 2 (1%)       | 2      | 2 (1%)          | 2      | 4 (1%)        | 4      |
| Myocardial infarction                                        | 0 (0%)       | 0      | 1 (<1%)         | 1      | 1 (<1%)       | 1      |
| <b>INTRAOPERATIVE</b>                                        |              |        |                 |        |               |        |
| Iatrogenic Bowel Injury                                      | 5 (1%)       | 5      | 4 (1%)          | 5      | 9 (1%)        | 10     |
| Iatrogenic Ureteric Injury                                   | 1 (<1%)      | 1      | 0 (0%)          | 0      | 1 (<1%)       | 1      |
| <b>GASTROINTESTINAL</b>                                      |              |        |                 |        |               |        |
| Anastomotic Leak                                             | 12 (3%)      | 13     | 9 (2%)          | 9      | 21 (3%)       | 22     |
| Ileus                                                        | 25 (6%)      | 25     | 19 (5%)         | 19     | 44 (6%)       | 44     |
| Large Bowel Obstruction                                      | 2 (1%)       | 2      | 0 (0%)          | 0      | 2 (<1%)       | 2      |
| Small Bowel Obstruction                                      | 15 (4%)      | 19     | 13 (3%)         | 18     | 28 (4%)       | 37     |
| Staple Line Haematoma                                        | 1 (<1%)      | 1      | 2 (1%)          | 2      | 3 (<1%)       | 3      |
| Gastrointestinal Bleeding                                    | 1 (<1%)      | 1      | 0 (0%)          | 0      | 1 (<1%)       | 1      |
| Constipation                                                 | 0 (0%)       | 0      | 7 (2%)          | 7      | 7 (1%)        | 7      |
| Diarrhoea                                                    | 4 (1%)       | 4      | 3 (1%)          | 5      | 7 (1%)        | 9      |
| Dyspepsia                                                    | 1 (<1%)      | 1      | 1 (<1%)         | 1      | 2 (<1%)       | 2      |
| Enterocutaneous Fistula                                      | 4 (1%)       | 4      | 4 (1%)          | 5      | 8 (1%)        | 9      |
| Acute Colitis Pouchitis                                      | 5 (1%)       | 5      | 6 (2%)          | 6      | 11 (1%)       | 11     |
| C.Diff Infection                                             | 3 (1%)       | 3      | 4 (1%)          | 4      | 7 (1%)        | 7      |
| Intraabdominal Abscess Only                                  | 2 (1%)       | 2      | 4 (1%)          | 4      | 6 (1%)        | 6      |
| Pancreatitis                                                 | 1 (<1%)      | 1      | 0 (0%)          | 0      | 1 (<1%)       | 1      |
| <b>RESPIRATORY</b>                                           |              |        |                 |        |               |        |
| Pulmonary Atelectasis                                        | 2 (1%)       | 2      | 0 (0%)          | 0      | 2 (<1%)       | 2      |
| Pneumothorax                                                 | 0 (0%)       | 0      | 1 (<1%)         | 1      | 1 (<1%)       | 1      |
| Pneumonia                                                    | 13 (3%)      | 14     | 5 (1%)          | 5      | 18 (2%)       | 19     |
| <b>NEOPLASMS</b>                                             |              |        |                 |        |               |        |
| Cancer Recurrence                                            | 7 (2%)       | 8      | 7 (2%)          | 8      | 14 (2%)       | 16     |
| DeNovo Cancer                                                | 0 (0%)       | 0      | 5 (1%)          | 5      | 5 (1%)        | 5      |
| <b>METABOLIC/OTHER</b>                                       |              |        |                 |        |               |        |
| Sepsis/Infection                                             | 8 (2%)       | 8      | 3 (1%)          | 3      | 11 (1%)       | 11     |
| Gout                                                         | 0 (0%)       | 0      | 1 (<1%)         | 1      | 1 (<1%)       | 1      |
| Dehydration/ Kidney Injury                                   | 7 (2%)       | 8      | 2 (1%)          | 2      | 9 (1%)        | 10     |
| Retention                                                    | 2 (1%)       | 2      | 2 (1%)          | 2      | 4 (1%)        | 4      |
| Fall/Syncope                                                 | 2 (1%)       | 2      | 3 (1%)          | 3      | 5 (1%)        | 5      |
| Cerebrovascular Accident                                     | 1 (<1%)      | 1      | 3 (1%)          | 3      | 4 (1%)        | 4      |
| Venous Thromboembolism                                       | 2 (1%)       | 2      | 0 (0%)          | 0      | 2 (<1%)       | 2      |
| Metabolic                                                    | 0 (0%)       | 0      | 1 (<1%)         | 1      | 1 (<1%)       | 1      |
| Other                                                        | 15 (4%)      | 15     | 9 (2%)          | 11     | 24 (3%)       | 26     |
| <b>Total</b>                                                 |              | 222    |                 | 196    |               | 418    |

Of the 790 patients randomised, 274 (34.7%) experienced at least one SAE.
